# Supplementary material
Source: publisher figshare collection journal article supplement (https://rs.figshare.com/ndownloader/files/37467436)
Supplement: Supplementary file 1 [file 37467436]

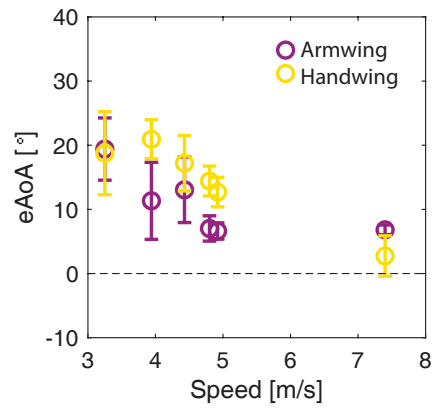

Figure S2: Arm/handwing effective angle of attack (eAoA) as a function of speed. eAoA, calculated at maximum wingspan near mid-downstroke, decreases with speed for the armwing (purple, 1/4 spanwise segment) and the handwing (gold, 3/4 spanwise segment). The vertical bar indicates one standard deviation of uncertainty resulting from a Monte Carlo randomization process.
